# Supplementary figures and images for: Randomized Controlled Trial of Self-Directed Care for Medically Uninsured Adults With Serious Mental Illness
Source: Atypon-hosted journal article supplement (doi:10.1176/appi.ps.20220508), 2023-03-29

### Self-Directed Care CONSORT chart

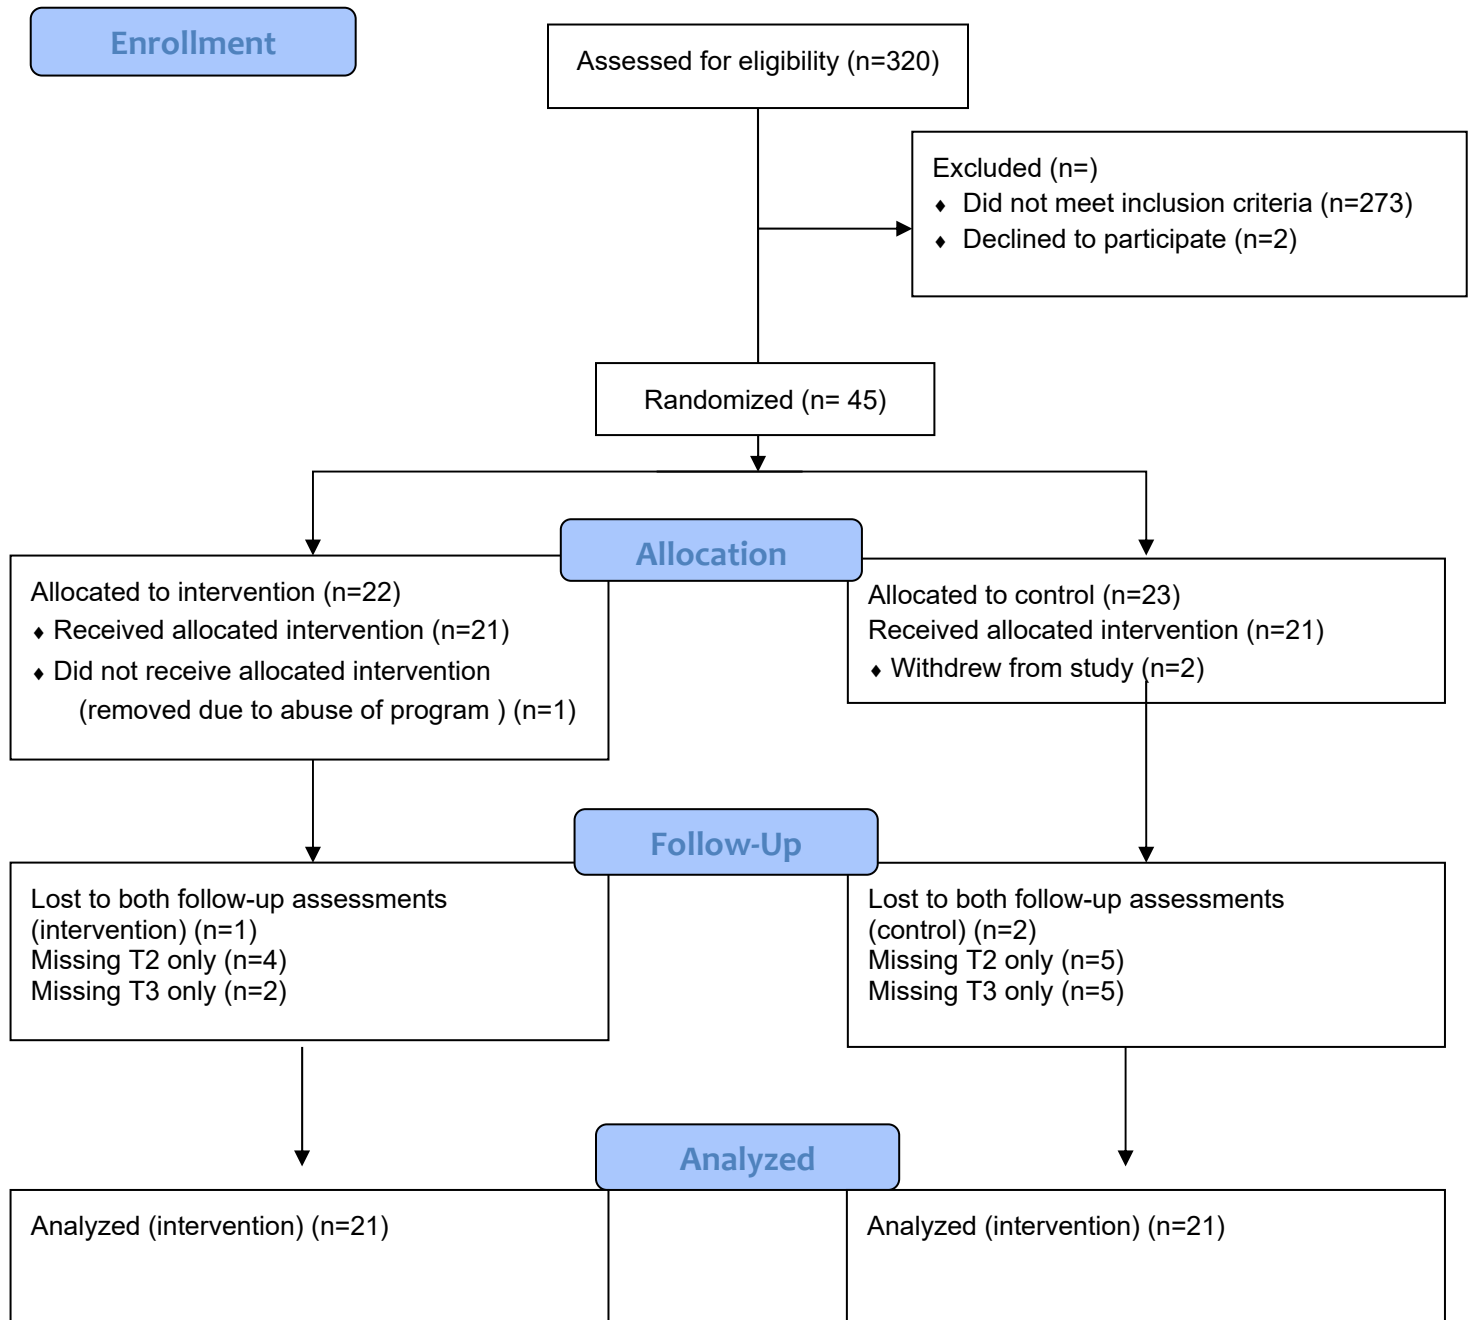

Supplement: appi.ps.20220508.ds001.pdf [file appi.ps.20220508.ds001.pdf]
